CORRECTION

## Correction: Age-related changes in gait, balance, and strength parameters: A cross-sectional study

Asghar Rezaei, Sandesh G. Bhat, Chih-Hsiu Cheng, Robert J. Pignolo, Lichun Lu, Kenton R. Kaufman

The image for [Fig 3](#) is incorrect. Please see the correct [Fig 3](#) here.

In [Table 1](#), the data in the columns 3 and 4 for the variable “RMS(CoP)<sub>EC/EO</sub>” and “Path(CoP)<sub>EC/EO</sub>” are incorrect. Please see the correct [Table 1](#) here.

In the Bipedal subsection of the Results, there is an error in the third sentence of the second paragraph. The correct sentence is: The Romberg ratio (Path (CoP)EC/EO) was not related to Age or Sex ( $R^2=0.09$ ,  $p=0.21$ ).

In the Unipedal subsection of the Results, there is an error in the fourth sentence of the paragraph. The correct sentence is: Unipedal standing duration, when normalized, declined at the rate of 21 (s/s) per decade in the non-dominant side ( $R^2=0.38$ ,  $p<0.001$ ) and at the rate of 17 (s/s) per decade in the dominant side ( $R^2=0.27$ ,  $p=0.004$ ) for both the sexes.

### Reference

1. Rezaei A, Bhat SG, Cheng C-H, Pignolo RJ, Lu L, Kaufman KR. Age-related changes in gait, balance, and strength parameters: a cross-sectional study. PLoS One. 2024;19(10):e0310764. <https://doi.org/10.1371/journal.pone.0310764> PMID: [39441815](https://pubmed.ncbi.nlm.nih.gov/39441815/)

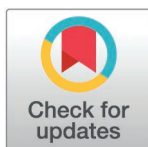

### OPEN ACCESS

**Citation:** Rezaei A, Bhat SG, Cheng C-H, Pignolo RJ, Lu L, Kaufman KR (2026) Correction: Age-related changes in gait, balance, and strength parameters: A cross-sectional study. PLoS One 21(3): e0344583. <https://doi.org/10.1371/journal.pone.0344583>

**Published:** March 9, 2026

**Copyright:** © 2026 Rezaei et al. This is an open access article distributed under the terms of the [Creative Commons Attribution License](https://creativecommons.org/licenses/by/4.0/), which permits unrestricted use, distribution, and reproduction in any medium, provided the original author and source are credited.

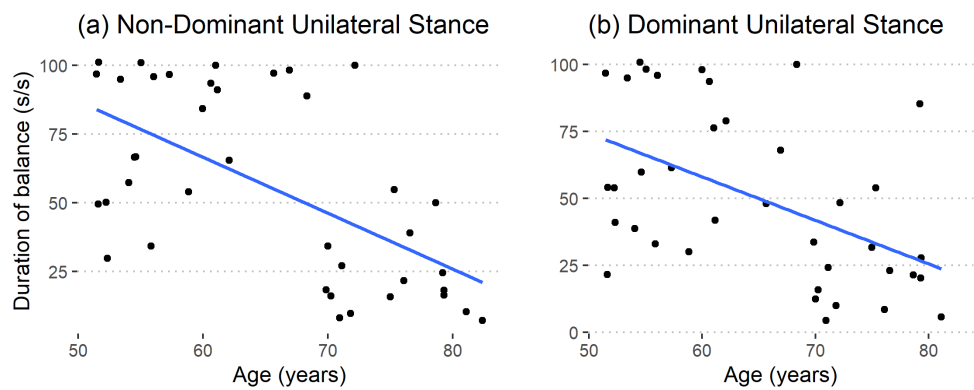

**Fig 3. Unipedal standing duration for the (a) non-dominant ( $R^2 = 0.38$ ,  $p < 0.001$ ) and (b) dominant sides ( $R^2 = 0.27$ ,  $p = 0.004$ ).**

<https://doi.org/10.1371/journal.pone.0344583.g003>

**Table 1. Scaling techniques for the outcome measures according to Hof [35].**

| Variable                          | Definition                                                                         | Unit         | Scaling Parameters              |
|-----------------------------------|------------------------------------------------------------------------------------|--------------|---------------------------------|
| <b>Strength measures</b>          |                                                                                    |              |                                 |
| Dominant grip strength            | Maximum dominant side grip strength value out of three trials                      | Kg           | $(M)^{-1}$                      |
| Dominant knee strength            | Maximum dominant side knee strength value out of three trials                      | N.m          | $(M.g.l_1)^{-1}$                |
| <b>Bipedal standing balance</b>   |                                                                                    |              |                                 |
| $RMS(CoP)_{EO}$                   | Average standing postural sway with eyes open on both legs                         | m            | $(l_1)^{-1}$                    |
| $RMS(CoP)_{EC}$                   | Average standing postural sway with eyes closed on both legs                       | m            | $(l_1)^{-1}$                    |
| $RMS(CoP)_{EC/EO}$                | Romberg ratio of the standing postural sway on both legs                           | –            | –                               |
| $Path(CoP)_{EC}$                  | Amount of movement in the CoP with eyes open on both legs                          | m            | $(l_1)^{-1}$                    |
| $Path(CoP)_{EO}$                  | Amount of movement in the CoP with eyes closed on both legs                        | m            | $(l_1)^{-1}$                    |
| $Path(CoP)_{EC/EO}$               | Romberg ratio of the amount of movement in the CoP when standing on both legs      | –            | –                               |
| <b>Unipedal standing balance</b>  |                                                                                    |              |                                 |
| $RMS(CoP)_{Dominant}$             | Average standing postural sway with eyes open on the dominant leg                  | m            | $(l_1)^{-1}$                    |
| $RMS(CoP)_{NonDominant}$          | Average standing postural sway with eyes open on the non-dominant leg              | m            | $(l_1)^{-1}$                    |
| $Duration(balance)_{Dominant}$    | Duration of balance on the dominant leg                                            | sec          | $(\sqrt{l_1/g})^{-1}$           |
| $Duration(balance)_{NonDominant}$ | Duration of balance on the non-dominant leg                                        | sec          | $(\sqrt{l_1/g})^{-1}$           |
| <b>Gait parameters</b>            |                                                                                    |              |                                 |
| Gait speed                        | Distance traveled per time unit                                                    | $m.sec^{-1}$ | $(l_1 \cdot \sqrt{l_1/g})^{-1}$ |
| Cadence                           | Number of steps per time unit                                                      | $sec^{-1}$   | $\sqrt{l_1/g}$                  |
| Stride length                     | Sagittal distance between successive heel strikes of same foot                     | m            | $(l_1)^{-1}$                    |
| Step width                        | Lateral distance between successive heel strikes of two feet                       | m            | $(l_1)^{-1}$                    |
| Gait stability ratio              | Cadence divided by gait speed                                                      | $m^{-1}$     | $l_1$                           |
| Single support                    | One foot in touch with the ground                                                  | %            | –                               |
| Double support                    | Both feet in touch with the ground                                                 | %            | –                               |
| <b>Dynamic gait balance</b>       |                                                                                    |              |                                 |
| $StepLength_{right}$              | Distance between two consecutive steps on the right side                           | m            | $(l_2)^{-1}$                    |
| $StepLength_{left}$               | Distance between two consecutive steps on the left side                            | m            | $(l_2)^{-1}$                    |
| $DSM_{right}$                     | Shortest distance from the xCoM to the BoS during the gait cycle for the right leg | m            | $(l_2)^{-1}$                    |
| $DSM_{left}$                      | Shortest distance from the xCoM to the BoS during the gait cycle for the left leg  | m            | $(l_2)^{-1}$                    |

Abbreviations: M: Body mass (units: Kg);  $l_1$ : Leg length (units: m); g: gravity (units:  $m.s^{-2}$ );  $l_2$ : Height (units: m).

<https://doi.org/10.1371/journal.pone.0344583.t001>
